# Supplementary material for: Concerted measurements of free amino acids at the Cape VerdeIslands: High enrichments in submicron sea spray aerosol particlesand cloud droplets
Source: Copernicus journal article supplement (doi:10.5194/acp-2019-976), 2020-02-17
Supplement: Supplementary file 1 [file acp-2019-976-supplement.pdf]

## Supplement of

# Concerted measurements of free amino acids at the Cape Verde Islands: High enrichments in submicron sea spray aerosol particles and cloud droplets

5 Nadja Triesch<sup>1</sup>, Manuela van Pinxteren<sup>1</sup>, Anja Engel<sup>2</sup> and Hartmut Herrmann<sup>1</sup>

<sup>1</sup>Leibniz-Institute for Tropospheric Research (TROPOS), Atmospheric Chemistry Department (ACD), Leipzig 04318, Germany

<sup>2</sup>GEOMAR Helmholtz Centre for Ocean Research, Kiel 24105, Germany

10 Correspondence to: Hartmut Herrmann ([herrmann@tropos.de](mailto:herrmann@tropos.de))

**Table S1: Limit of quantification (LOQ) of the individual FAA in the matrices of the marine environment - on aerosol particles as atmospheric concentration in  $\text{pg m}^{-3}$ , as seawater concentration in  $\text{nmol L}^{-1}$  and as cloud water concentration in  $\mu\text{g L}^{-1}$  and  $\text{ng m}^{-3}$**

| analyte       | atmospheric concentration <sup>(a)</sup> | seawater concentration <sup>(b)</sup> | cloud water concentration <sup>(c)</sup> |                    |
|---------------|------------------------------------------|---------------------------------------|------------------------------------------|--------------------|
|               | $\text{pg m}^{-3}$                       | $\text{nmol L}^{-1}$                  | $\mu\text{g L}^{-1}$                     | $\text{ng m}^{-3}$ |
| serine        | 7.9                                      | 4.8                                   | 0.2                                      | 0.06               |
| glycine       | 7.9                                      | 6.7                                   | 0.2                                      | 0.06               |
| glutamic acid | 7.9                                      | 3.4                                   | 0.2                                      | 0.06               |
| threonine     | 7.9                                      | 4.2                                   | 1.0                                      | 0.30               |
| alanine       | 39.5                                     | 5.6                                   | 0.2                                      | 0.06               |
| GABA          | 39.5                                     | 24.2                                  | 1.0                                      | 0.30               |
| proline       | 7.9                                      | 4.3                                   | 0.2                                      | 0.06               |
| aspartic acid | 39.5                                     | 3.8                                   | 0.2                                      | 0.06               |
| tyrosine      | 7.9                                      | 2.8                                   | 1.0                                      | 0.30               |
| methionine    | 39.5                                     | 16.8                                  | 1.0                                      | 0.30               |
| valine        | 7.9                                      | 4.3                                   | 1.0                                      | 0.30               |
| phenylalanine | 7.9                                      | 3.0                                   | 1.0                                      | 0.30               |
| glutamine     | 39.5                                     | 3.4                                   | 1.0                                      | 0.30               |
| isoleucine    | 39.5                                     | 3.8                                   | 1.0                                      | 0.30               |
| leucine       | 39.5                                     | 3.8                                   | 1.0                                      | 0.30               |

For the LOQ, the concentration of the lowest but still quantifiable calibration stage of the external calibration was used and then extrapolated specifically for the various marine matrices:

(a) The following were taken into account for the calculation of the atmospheric concentration of individual FAA: the enrichment factor caused by the reducing of the extract volume, the proportion of the investigated filter material (92 % of the filter material of each stage for the aqueous extract) and an median of the sampled air flow (110 m<sup>3</sup>).

(b) For the calculation of the seawater concentration, the enrichment factor caused by the reducing of the desalinated sample volume was considered.

(c) For the calculation of the cloud water concentration in µg L<sup>-1</sup>, the enrichment factor caused by the reducing of the cloud water volume was considered. Additionally an averaged liquid water content (LWC) of 0.297 was taken into account to calculate additionally the cloud water concentration in ng m<sup>-3</sup>.

**Table S2: Wind speed, chl-*a* concentration in the seawater samples and the FAA concentration in the size-segregated aerosol particle samples (distinguished between the submicron and the supermicron size range) at the CVAO**

| sampling stop | wind speed*       | chl- <i>a</i> concentration** | ∑FAA concentration in PM <sub>10</sub> (B1-5) | ∑FAA concentration in submicron size range | ∑FAA concentration in supermicron size range |
|---------------|-------------------|-------------------------------|-----------------------------------------------|--------------------------------------------|----------------------------------------------|
|               | m s <sup>-1</sup> | µg L <sup>-1</sup>            | ng m <sup>-3</sup>                            | ng m <sup>-3</sup>                         | ng m <sup>-3</sup>                           |
| 20/09/2017    | 2.64              | 0.2                           | 2.37                                          | 1.53                                       | 0.84                                         |
| 22/09/2017    | 8.23              | -                             | 4.37                                          | 3.01                                       | 1.36                                         |
| 28/09/2017    | 4.87              | 0.2                           | 3.01                                          | 2.45                                       | 0.56                                         |
| 1/10/2017     | 8.58              | -                             | 1.76                                          | 1.28                                       | 0.47                                         |
| 4/10/2017     | 5.88              | -                             | 5.41                                          | 5.02                                       | 0.39                                         |
| 6/10/2017     | 5.18              | -                             | 3.10                                          | 2.89                                       | 0.21                                         |
| 7/10/2017     | 7.06              | 0.3                           | 6.82                                          | 6.32                                       | 0.50                                         |
| 10/10/2017    | 7.60              | 0.6                           | 3.77                                          | 3.11                                       | 0.66                                         |

\* The mean value of the measured wind speed during the 24 h sampling time of the aerosols was considered

\*\* Not on every matching sampling day the chl-*a* concentration in seawater was investigated. The chl-*a* concentration in seawater was generally low but increased during the campaign from 0.1 µg L<sup>-1</sup> to 0.6 µg L<sup>-1</sup> and will be discussed in more detail by van Pinxteren et al. (2019a).

**Table S3: Concentration of the individual FAA in the ULW and the SML samples in nmol L<sup>-1</sup> and the calculated enrichment factor (EF<sub>SML</sub>) (grey background) of the individual sampling days during the campaign**

|            |                   | Gly    | Ala    | Ser    | Glu   | Thr   | Pro   | Tyr  | Val   | Phe  | Asp   | Ile   | Leu   |
|------------|-------------------|--------|--------|--------|-------|-------|-------|------|-------|------|-------|-------|-------|
| 20/09/2017 | ULW               | 3.3*   | n.d.   | n.d.   | n.d.  | n.d.  | 2.2   | n.d. | 1.8   | n.d. | 83.5  | n.d.  | n.d.  |
|            | SML               | 35.7   | n.d.   | n.d.   | n.d.  | n.d.  | 12.8  | n.d. | 11.9  | n.d. | 167.1 | n.d.  | n.d.  |
|            | EF <sub>SML</sub> | 10.8*  | -      | -      | -     | -     | 5.9   | -    | 6.5   | -    | 2.0   | -     | -     |
| 22/09/2017 | ULW               | 3.3*   | 2.8*   | n.d.   | n.d.  | n.d.  | 2.2*  | n.d. | 2.1*  | n.d. | 67.0  | n.d.  | 1.9*  |
|            | SML               | 137.2  | 58.4   | n.d.   | n.d.  | n.d.  | 32.7  | n.d. | 22.2  | n.d. | 222.6 | n.d.  | 21.7  |
|            | EF <sub>SML</sub> | 41.6*  | 20.9*  | -      | -     | -     | 14.9* | -    | 10.6* | -    | 3     | -     | 11.4* |
| 27/09/2017 | ULW               | 3.3*   | 2.8*   | 2.4*   | 1.7*  | 2.1*  | 2.2*  | 1.4* | 2.1*  | 1.5* | 1.9*  | 1.9*  | 1.9*  |
|            | SML               | 323.4  | 371.2  | 371.2  | 34.4  | 100.3 | 32.9  | 2.9  | 72.4  | 2.1  | 184.7 | 18.8  | 30.1  |
|            | EF <sub>SML</sub> | 98.0*  | 132.6* | 154.7* | 20.2* | 47.8* | 15.0* | 2.1* | 34.5* | 1.4* | 97.2* | 9.9*  | 15.8* |
| 28/09/2017 | ULW               | n.d.   | 2.8*   | 2.4*   | n.d.  | 2.1*  | 2.2*  | n.d. | 2.1*  | n.d. | 1.9*  | n.d.  | 1.9*  |
|            | SML               | n.d.   | 52.5   | 33.8   | n.d.  | 12.4  | 3.4   | n.d. | 6.9   | n.d. | 14.1  | n.d.  | 3.3   |
|            | EF <sub>SML</sub> | -      | 18.7*  | 14.1*  | -     | 5.9*  | 1.5*  | -    | 3.3*  | -    | 7.4*  | -     | 1.8*  |
| 2/10/2017  | ULW               | 3.3*   | 2.8*   | 2.4*   | 1.7*  | 2.1*  | 2.2*  | 1.4* | 2.1*  | n.d. | 1.9*  | 1.9*  | 1.9*  |
|            | SML               | 410.9  | 260.2  | 742.2  | 11.8  | 111.7 | 21.1  | 3.9  | 39.7  | n.d. | 69.5  | 11.9  | 19.3  |
|            | EF <sub>SML</sub> | 124.5* | 92.9*  | 309.2* | 6.9*  | 53.2* | 9.6*  | 2.8* | 18.9* | -    | 36.6* | 6.3*  | 10.1* |
| 3/10/2017  | ULW               | 3.3*   | 13.6   | 2.4*   | 1.7*  | 2.1*  | 2.2*  | n.d. | 2.0   | n.d. | 1.9*  | 10.4  | 1.9*  |
|            | SML               | 123.5  | 117.0  | 187.8  | 3.1   | 24.4  | 40.0  | n.d. | 32.8  | n.d. | 22.4  | 15.5  | 31.7  |
|            | EF <sub>SML</sub> | 37.4*  | 9      | 78.2*  | 1.8*  | 11.6* | 18.2* | -    | 16.2  | -    | 11.8* | 1.5   | 16.7* |
| 4/10/2017  | ULW               | 350.4  | 169.0  | 273.1  | 1.7*  | 29.8  | 72.3  | 1.4* | 90.4  | 1.5* | 24.1  | 1.9*  | 74.1  |
|            | SML               | 231.0  | 245.5  | 274.0  | 9.7   | 61.9  | 53.5  | 3.1  | 88.6  | 3.7  | 63.0  | 35.1  | 53.3  |
|            | EF <sub>SML</sub> | 0.7    | 1.5    | 1.0    | 5.7*  | 2.1   | 0.7   | 2.2* | 1.0   | 2.5* | 2.6   | 18.5* | 0.7   |
| 5/10/2017  | ULW               | 16.4   | 112.4  | 54.0   | n.d.  | 1.1   | 13.4  | n.d. | 15.6  | n.d. | 2.7   | 3.1   | 11.4  |
| 6/10/2017  | ULW               | 3.3*   | 2.8*   | 2.4*   | 1.7*  | 2.1*  | 1.4   | 1.4* | 2.6   | 1.5* | 1.9*  | 1.9*  | 2.2   |
|            | SML               | 461.0  | 412.5  | 736.4  | 17.5  | 118.4 | 91.8  | 4.8  | 101.2 | 2.7  | 163.3 | 44.1  | 71.3  |

|            |                   |        |        |        |       |        |       |       |       |       |        |       |       |
|------------|-------------------|--------|--------|--------|-------|--------|-------|-------|-------|-------|--------|-------|-------|
|            | EF <sub>SML</sub> | 139.7* | 147.3* | 306.8* | 10.3* | 56.4*  | 64.2  | 3.4*  | 38.7  | 1.8*  | 86.0*  | 23.2* | 32.7  |
| 7/10/2017  | ULW               | 120.6  | 192.5  | 298.5  | 16.7  | 31.2   | 32.7  | 1.4*  | 37.6  | 1.5*  | 82.3   | 10.7  | 15.7  |
|            | SML               | 359.7  | 400.6  | 716.0  | 59.9  | 119.5  | 80.6  | 20.5  | 85.3  | 15.8  | 191.4  | 41.4  | 61.8  |
|            | EF <sub>SML</sub> | 3.0    | 2.1    | 2.4    | 3.6   | 3.8    | 2.5   | 14.6* | 2.3   | 10.5* | 2.3    | 3.9   | 3.9   |
| 9/10/2017  | ULW               | 3.3*   | 2.8*   | 2.4*   | 1.7*  | 2.1*   | 2.2*  | 1.4*  | 2.1*  | 1.5*  | 1.9*   | 1.9*  | 1.9*  |
|            | SML               | 697.9  | 635.0  | 1237.4 | 66.5  | 224.0  | 125.8 | 26.1  | 150.6 | 25.4  | 285.5  | 70.7  | 99.1  |
|            | EF <sub>SML</sub> | 211.5* | 226.8* | 515.6* | 39.1* | 106.7* | 57.2* | 18.7* | 71.7* | 16.9* | 150.3* | 37.2* | 52.1* |
| 10/10/2017 | ULW               | 153.3  | 166.0  | 207.5  | 1.7*  | 19.6   | 38.9  | n.d.  | 29.2  | n.d.  | 28.8   | 3.3   | 19.5  |
|            | SML               | 537.9  | 361.3  | 504.5  | 12.3  | 72.2   | 62.4  | n.d.  | 58.5  | n.d.  | 47.2   | 12.7  | 20.5  |
|            | EF <sub>SML</sub> | 3.5    | 2.2    | 2.4    | 7.2*  | 3.7    | 1.6   | -     | 2.0   | -     | 1.6    | 3.9   | 1.0   |

n.d. – not detected: if the individual FAA was not detected in the SML, the concentration in the ULW was not calculated (LOQ/2) to determine the EF<sub>SML</sub>.

\* For this samples, the individual FAA was quantified in the SML but below the LOQ in the ULW samples no quantification was possible. Therefore, the concentration of the analyte in the ULW were assumed to be LOQ/2, (LOQ is listed in Table S1).

##### 5 Enrichment of FAA in SML

Looking at the individual amino acids (Table S3), Ser with a concentration range of 54-299 nmol L<sup>-1</sup> (ULW) and 34-1237 nmol L<sup>-1</sup> (SML) had usually the highest contribution to  $\sum$ FAA. Also Ala (ULW: 14-193 nmol L<sup>-1</sup>, SML: 52-635 nmol L<sup>-1</sup>), Gly (ULW: 16-350 nmol L<sup>-1</sup>, SML: 36-698 nmol L<sup>-1</sup>) and Asp (ULW: 3-83 nmol L<sup>-1</sup>, SML: 14-286 nmol L<sup>-1</sup>) were included in higher concentrations as part of  $\sum$ FAA. This observed high contribution of Ser, Ala, Gly and Asp to  $\sum$ FAA in the ULW and especially in the SML are in accordance with the results of Kuznetsova et al. (2004) and Reinthaler et al. (2008). To compare the concentration of  $\sum$ FAA in the SML with the ULW samples, the enrichment factor in SML (EF<sub>SML</sub>) was calculated using Eq. (1) and is shown in Fig. 1 (stars). Regarding the EF<sub>SML</sub> of  $\sum$ FAA, an enrichment of  $\sum$ FAA in SML between 1.1 and 298.4 could be observed (averaged EF<sub>SML</sub> of  $\sum$ FAA: 57.2). Although there is a wide variance in the EF<sub>SML</sub> for  $\sum$ FAA, our results are in good agreement with the literature. In the subtropical Atlantic, EF<sub>SML</sub> of dissolved FAA between 7.6 and 229.4 (59.3±68.8) and in western Mediterranean Sea between 6.2 and 26.1 (16.5±9.1) were reported by Reinthaler et al. (2008). The EF<sub>SML</sub> depends on the measured concentration of  $\sum$ FAA in the SML and the ULW, and here daily variations could be observed during the campaign. Especially the higher EF<sub>SML</sub> on e.g. 6/10/2017 with 298.4 resulted from higher concentrations of  $\sum$ FAA in the SML (2224.9 nmol L<sup>-1</sup>) and very low concentration in the ULW (6.23 nmol L<sup>-1</sup>).

**Table S4: Concentration of FAA in a SML sample from 21/11/2013, 2pm (local time), coordinates: 16°84'68''N, 24°85'25''W**

| analyte*      | nmol L <sup>-1</sup> |
|---------------|----------------------|
| aspartic acid | 57.8                 |
| glutamic acid | 18.9                 |
| serine        | 212.4                |
| glycine       | 168.2                |
| arginine      | 39.3                 |
| threonine     | 7.2                  |
| alanine       | 60.8                 |
| GABA          | 6.3                  |
| tyrosine      | 13.7                 |
| valine        | 20.3                 |
| isoleucine    | 14.4                 |
| phenylalanine | 9.5                  |
| leucine       | 13.6                 |
| $\Sigma$ FAA  | 642.4                |

\* analytes were measured with a high performance liquid chromatograph (1260 HPLC system, Agilent Technologies) using a C<sub>18</sub> column (Phenomex Kinetex) after in line ortho-phthalaldehyde derivatization with mercaptoethanol after Lindroth and Mopper (1979) and Dittmar (2009).

**Table S5: DOC and TDN concentrations in the SML and the ULW samples, their enrichment in the SML ( $EF_{SML}$ ) calculated using Eq. (1) and the percentage contribution of  $\Sigma FAA$  to DOC and TDN in seawater samples; NA – not available**

| sampling date | sample type | DOC in $\mu\text{g L}^{-1}$ | $EF_{SML}$ DOC | TDN in $\mu\text{g L}^{-1}$ | $EF_{SML}$ TDN | Percentage of $\Sigma FAA$ to DOC (**) | Percentage of $\Sigma FAA$ to TDN (***) |
|---------------|-------------|-----------------------------|----------------|-----------------------------|----------------|----------------------------------------|-----------------------------------------|
| 20/09/2017    | SML         | 2779.0                      | 2.5            | 380.3                       | 0.8            | 0.4                                    | 0.8                                     |
|               | ULW         | 1095.3                      |                | 478.2                       |                | 0.4                                    | 0.3                                     |
| 22/09/2017    | SML         | 1674.6                      | 0.7            | 280.2                       | 1.2            | 1.3                                    | 5.2                                     |
|               | ULW         | 2368.5                      |                | 236.7                       |                | 0.1                                    | 0.2                                     |
| 27/09/2017    | SML         | 2020.6                      | 1.9            | 193.6                       | 1.0            | 3.4                                    | 13.0                                    |
|               | ULW         | 1073.7                      |                | 189.6                       |                | NA                                     | NA                                      |
| 28/09/2017    | SML         | 2271.0                      | 1.7            | 248.3                       | 1.1            | 0.2                                    | 0.7                                     |
|               | ULW         | 1372.5                      |                | 228.5                       |                | NA                                     | NA                                      |
| 2/10/2017(*)  | SML         | 2017.8                      | 1.5            | 270.4                       | 1.3            | 3.1                                    | 8.8                                     |
|               | ULW         | 1340.5                      |                | 206.5                       |                | NA                                     | NA                                      |
| 3/10/2017     | SML         | 2196.6                      | 1.6            | 267.9                       | 1.5            | 1.1                                    | 3.1                                     |
|               | ULW         | 1366.9                      |                | 174.4                       |                | NA                                     | 0.1                                     |
| 4/10/2017     | SML         | 2050.2                      | 1.9            | 196.7                       | 1.0            | 2.3                                    | 8.0                                     |
|               | ULW         | 1085.3                      |                | 196.4                       |                | 4.0                                    | 7.8                                     |
| 5/10/2017     | ULW         | 1143.3                      |                | 112.4                       |                | 0.8                                    | 2.9                                     |
| 6/10/2017     | SML         | 3327.0                      | 2.6            | 496.7                       | 1.9            | 2.6                                    | 6.3                                     |
|               | ULW         | 1291.3                      |                | 255.7                       |                | NA                                     | 0.03                                    |
| 7/10/2017     | SML         | 1606.6                      | 1.7            | 124.7                       | 0.9            | 5.5                                    | 24.2                                    |
|               | ULW         | 946.9                       |                | 140.1                       |                | 3.5                                    | 8.4                                     |
| 9/10/2017     | SML         | 1941.0                      |                | 120.3                       |                | 7.6                                    | 42.4                                    |
| 10/10/2017    | SML         | 1821.0                      | 1.4            | 128.0                       | 0.8            | 3.3                                    | 18.5                                    |
|               | ULW         | 1291.3                      |                | 156.1                       |                | 2.0                                    | 6.0                                     |

(\*) For interpretation of concerted measurements, the seawater samples, sampled during the 24 h sampling interval of size-segregated aerosol particle samples, were considered. Consequently, the date of the sampling stop of the aerosol particle samples matched with the sampling date of seawater samples, one exception: seawater sampling on 2/10/2017 were considered for the size-segregated aerosol particle sample, collected from 30/09/2017 - 1/10/2017, because on 1/10/2017 no seawater sampling was performed.

(\*\*) For the calculation of the percentage contribution of  $\Sigma FAA$  to DOC, the carbon content of the individual amino acids, listed in Table S6, was considered.

(\*\*) For the calculation of the percentage contribution of  $\Sigma FAA$  to TDN, the nitrogen content of the individual amino acids, listed in Table S6, was considered.

For the analysis of sodium corresponding seawater samples (ULW and SML) with  $n = 5$  was investigated. In the SML the sodium concentration was  $12.53 \pm 0.53 \text{ g L}^{-1}$  and in the ULW the sodium concentration was  $12.45 \pm 0.37 \text{ g L}^{-1}$ . Because of small relative standard deviations (4.2 % for SML and 2.9 % for ULW), the mean value of sodium concentration in SML samples ( $12.53 \text{ g L}^{-1}$ ) was used for the calculation of  $EF_{\text{aer}}$  and  $EF_{\text{cw}}$ .

10 **Table S6: Overview of the molar mass, molecular formula and the carbon and nitrogen content of the individual FAA**

| analyte       | molar mass<br>in $\text{g mol}^{-1}$ | molecular<br>formula | carbon content*<br>of the analyte in % | nitrogen content*<br>of the analyte in % |
|---------------|--------------------------------------|----------------------|----------------------------------------|------------------------------------------|
| serine        | 105.09                               | C3H7NO3              | 34.28                                  | 13.33                                    |
| glycine       | 75.07                                | C2H5NO2              | 32.00                                  | 18.66                                    |
| glutamic acid | 147.13                               | C5H9NO4              | 40.81                                  | 9.52                                     |
| threonine     | 119.12                               | C4H9NO3              | 40.33                                  | 11.76                                    |
| alanine       | 89.09                                | C3H7NO2              | 40.44                                  | 15.73                                    |
| GABA          | 103.12                               | C4H9NO2              | 46.59                                  | 13.59                                    |
| proline       | 115.13                               | C5H9NO2              | 52.16                                  | 12.17                                    |
| tyrosine      | 181.19                               | C9H11NO3             | 59.66                                  | 7.73                                     |
| methionine    | 149.21                               | C5H11NO2S            | 40.25                                  | 9.39                                     |
| valine        | 117.15                               | C5H11NO2S            | 51.26                                  | 11.96                                    |
| phenylalanine | 165.19                               | C9H11NO2             | 65.43                                  | 8.48                                     |
| glutamine     | 146.15                               | C5H10N2O3            | 41.09                                  | 19.17                                    |
| aspartic acid | 133.10                               | C4H7NO4              | 36.09                                  | 10.53                                    |
| isoleucine    | 131.17                               | C6H13NO2             | 54.94                                  | 10.68                                    |
| leucine       | 131.17                               | C6H13NO2             | 54.94                                  | 10.68                                    |

\*The carbon and nitrogen content of individual FAA were taken into account for the calculation of the  $FAA / \sum FAA$  contribution to WSOC, TDN and WSON concentration in the size-segregated aerosol particle samples and for the calculation of  $FAA / \sum FAA$  contribution to DOC and TDN concentration in the seawater samples.

**Table S7: Percentage contribution of the amino acid groups to  $\Sigma$ FAA on the submicron and the supermicron aerosol particles during the campaign and as an average; hydrophilic (Glu, Asp, GABA), neutral (Ser, Gly, Thr, Pro, Tyr), hydrophobic amino acids (Ala, Val, Phe, Ile, Leu)**

| sampling date          | amino acid groups in % |         |             |
|------------------------|------------------------|---------|-------------|
|                        | hydrophilic            | neutral | hydrophobic |
| 20/09/2017 submicron   | 0                      | 97      | 3           |
| 20/09/2017 supermicron | 0                      | 89      | 11          |
| 22/09/2017 submicron   | 4                      | 89      | 7           |
| 22/09/2017 supermicron | 0                      | 88      | 12          |
| 28/09/2017 submicron   | 0                      | 93      | 7           |
| 28/09/2017 supermicron | 0                      | 99      | 1           |
| 1/10/2017 submicron    | 0                      | 100     | 0           |
| 1/10/2017 supermicron  | 0                      | 96      | 4           |
| 4/10/2017 submicron    | 12                     | 74      | 14          |
| 4/10/2017 supermicron  | 0                      | 100     | 0           |
| 6/10/2017 submicron    | 48                     | 52      | 0           |
| 6/10/2017 supermicron  | 0                      | 100     | 0           |
| 7/10/2017 submicron    | 55                     | 42      | 3           |
| 7/10/2017 supermicron  | 0                      | 84      | 16          |
| 10/10/2017 submicron   | 0                      | 95      | 5           |
| 10/10/2017 supermicron | 0                      | 90      | 10          |
| averaged submicron     | 15                     | 80      | 5           |
| averaged supermicron   | 0                      | 93      | 7           |

5

10



**Table S8: Atmospheric concentration of inorganic ions as sulfate (SO<sub>4</sub><sup>2-</sup>), MSA, MSA/sulfate ratio, sodium (Na<sup>+</sup>) and of mineral dust tracer as iron (Fe) and titanium (Ti) and the fractional ‘residence time over water and ice’ calculated from 96 h backward trajectories for the supermicron and submicron aerosol particle samples at the CVAO**

| sampling stop                        | ∑FAA               | MSA                | sulfate            | MSA/sulfat ratio | sodium             | Residence time over water & ice | Ti                 | Fe                 |
|--------------------------------------|--------------------|--------------------|--------------------|------------------|--------------------|---------------------------------|--------------------|--------------------|
|                                      | ng m <sup>-3</sup> | ng m <sup>-3</sup> | µg m <sup>-3</sup> |                  | ng m <sup>-3</sup> |                                 | ng m <sup>-3</sup> | ng m <sup>-3</sup> |
| <b>supermicron aerosol particles</b> |                    |                    |                    |                  |                    |                                 |                    |                    |
| 20/09/2017                           | 0.8                | 18.7               | 1.9                | 0.010            | 3903               | 0.84                            | 16.3               | 259.3              |
| 22/09/2017                           | 1.4                | 10.5               | 1.1                | 0.021            | 3445               | 0.90                            | 19.0               | 182.8              |
| 28/09/2017                           | 0.6                | 5.2                | 0.8                | 0.006            | 1471               | 0.85                            | 12.6               | 404.5              |
| 1/10/2017                            | 0.5                | 4.5                | 1.1                | 0.004            | 3409               | 0.67                            | 16.8               | 203.2              |
| 4/10/2017                            | 0.4                | 4.9                | 0.8                | 0.006            | 2379               | 0.96                            | 9.3                | 110.2              |
| 6/10/2017                            | 0.2                | 4.6                | 0.8                | 0.006            | 2252               | 0.97                            | 17.8               | 160.6              |
| 7/10/2017                            | 0.5                | 3.8                | 0.9                | 0.004            | 2661               | 0.96                            | 48.5               | 451.6              |
| 10/10/2017                           | 0.7                | 2.5                | 0.6                | 0.004            | 2002               | 0.91                            | 11.8               | 109.4              |
| <b>submicron aerosol particles</b>   |                    |                    |                    |                  |                    |                                 |                    |                    |
| 20/09/2017                           | 1.5                | 12.4               | 0.6                | 0.019            | 339                | 0.84                            | 0.3                | 21.2               |
| 22/09/2017                           | 3.0                | 15.8               | 0.8                | 0.018            | 229                | 0.90                            | 0.6                | 7.6                |
| 28/09/2017                           | 2.4                | 7.9                | 0.8                | 0.013            | 89                 | 0.85                            | 0.2                | 19.9               |
| 1/10/2017                            | 1.3                | 10.1               | 0.9                | 0.011            | 224                | 0.67                            | 1.0                | 19.1               |
| 4/10/2017                            | 5.0                | 18.4               | 1.3                | 0.016            | 186                | 0.96                            | 0.1                | 7.0                |
| 6/10/2017                            | 2.9                | 20.8               | 1.2                | 0.017            | 133                | 0.97                            | 0.7                | 12.1               |
| 7/10/2017                            | 6.3                | 14.9               | 0.9                | 0.021            | 139                | 0.96                            | 3.8                | 40.4               |
| 10/10/2017                           | 3.1                | 14.4               | 0.8                | 0.016            | 33                 | 0.91                            | 16.3               | 143.1              |

5 *Air mass origin: First indications of aerosol particle origin*

To obtain a first indication of the particle origin that might help to explain the differences in the particle composition concerning amino acids, the particles were associated with the history of the air masses and with marine and dust tracers. Overall, the CVAO station experienced north-easterly winds during this campaign. The air masses were mainly of marine origin and had no to very low dust influences during the first part of the campaign that is typical for this season in this region (Fomba et al., 2014). During the second part (after 29/09/2017) slightly elevated dust concentrations were observed. A comprehensive classification of the air masses will be given in van Pinxteren et al. (2019a) that provides an overview about air mass origin considering backward trajectories and dust concentrations for PM<sub>10</sub> particles. It has to be noted, that dust

generally influences the supermicron particles to a larger extent than the submicron particles (Fomba et al., 2013), meaning that bigger particles may be affected by dust sources whereas smaller particles may have stronger oceanic influences. Consequently, the submicron particles investigated in the present study might have different sources and might undergo different reactions compared to the supermicron particles. To investigate dust and marine impacts on especially the submicron particles we regarded several indicators specifically for the sub- and supermicron particles, such as MSA concentration, the MSA/sulfate ratio, the fractional residence time of the air masses over water and ice and the size-resolved concentrations of the mineral dust tracer iron (Fe) and titanium (Ti), listed in Table S8. Looking at the 96 h backward trajectories of the investigated air masses, it is obvious that all sampling days showed a very long ( $\geq 0.84$ ) or a long (0.67) fractional residence time over water and ice. The sulfate concentration was  $0.9 \pm 0.2 \mu\text{g m}^{-3}$  in the submicron size range and  $1.0 \pm 0.4 \mu\text{g m}^{-3}$  in the supermicron size range. The measured sulfate concentrations in our study were in good agreement with previous studies at the CVAO (Mueller et al., 2010; van Pinxteren et al., 2015). MSA, originating from the multiphase oxidation of dimethylsulfide (DMS) (Hoffmann et al., 2016), is a tracer for marine aerosol particles to estimate the magnitude of biogenic contributions to local aerosol population (Miyazaki et al., 2011; van Pinxteren et al., 2015). The MSA concentration in the submicron size range varied between  $7.9\text{--}20.8 \text{ ng m}^{-3}$  and between  $2.5\text{--}18.7 \text{ ng m}^{-3}$  in the supermicron size range. These values are again in good agreement with previous studies at the CVAO (Mueller et al., 2010). In our study, the molar ratio of MSA to sulfate was on average  $0.02 \pm 0.003$  in the submicron and  $0.01 \pm 0.006$  in the supermicron aerosol particles. The MSA/sulfate ratio in the submicron size range was within the MSA/sulfate ratios (0.02–0.04), reported for clean marine air over the Pacific Ocean (Nagao et al., 1999; Miyazaki et al., 2011) and consistent with the averaged MSA/sulfate ratio of  $\text{PM}_{10}$  samples (0.022) (van Pinxteren et al., 2015). In order to estimate potential dust influences during the campaign, mineral dust tracer as iron (Fe) and titanium (Ti) were considered. Looking at the time-resolved trend of Fe and Ti values in the size-segregated aerosol particle samples, it could be noticed that the lowest concentration of Fe ( $7.0 \text{ ng m}^{-3}$ , submicron size range) was detected on 4/10/2017 ( $\text{Fe}_{(\text{PM}_{10})}$ :  $117.2 \text{ ng m}^{-3}$ ). The Ti concentration on that day was  $0.1 \text{ ng m}^{-3}$  in the submicron aerosol particles and  $9.4 \text{ ng m}^{-3}$  for  $\text{PM}_{10}$ . Looking at typical marine background concentrations of trace metals at the CVAO for  $\text{PM}_{10}$  aerosol particles with  $< 25 \text{ ng m}^{-3}$  for Fe and  $< 6 \text{ ng m}^{-3}$  for Ti (Fomba et al., 2013), especially the submicron aerosol particles on e.g. 4/10/2017 showed very low or no mineral dust influences. The MSA concentrations and the MSA/sulfate ratio were generally higher for the submicron particles showing a higher potential influence of marine sources to the submicron particles. The concentrations of the dust tracers in the submicron particles were low and significantly lower than in the supermicron particles except for the last sampling day (10/10/2017). This indicated that the submicron particles were mainly of marine origin during most of the time of the campaign but exhibit a dust impact to some extent on the last sampling day. Comparing this classification of marine and dust influences to the concentration and composition of the amino acids, two things can be hypothesized. Oceanic sources can provide high concentrations of amino acids to the submicron aerosol particles that exhibit a certain complexity (significant amounts of GABA and Asp). Additional dust sources can contribute to a high amino acid concentration on the submicron aerosol particles, but they are less complex in their composition (no GABA, no Asp). However, as we observe a certain variability in the concentrations of the amino acid on predominant marine influenced days (20/09/2017, 22/09/2017,

28/09/2017, 1/10/2017, 4/10/2017, 6/10/2017, 7/10/2017), the contributions from the ocean are not always constant and can be quite low (e.g. 1/10/2017). At present, it remains unclear under which conditions the ocean provides more or less amino acid concentrations and complexity for the FAA in marine aerosol particles.

5 **Table S9: Atmospheric concentration of water-soluble organic carbon (WSOC), total dissolved nitrogen (TDN) and water-soluble organic nitrogen (WSON) on the submicron and the supermicron aerosol particles and the percentage contribution of  $\Sigma$ FAA to WSOC, TDN and WSON during the campaign and as an average; NA – not available data**

|                        | atmospheric concentration in ng m <sup>-3</sup> |                  |                   | percentage contribution (in %) of $\Sigma$ FAA to |                  |                   |
|------------------------|-------------------------------------------------|------------------|-------------------|---------------------------------------------------|------------------|-------------------|
|                        | WSOC                                            | TDN <sup>a</sup> | WSON <sup>b</sup> | WSOC <sup>d</sup>                                 | TDN <sup>e</sup> | WSON <sup>f</sup> |
| 20/09/2017 submicron   | 93.4                                            | 58.9             | 14.7              | 0.04                                              | 0.03             | 0.11              |
| 20/09/2017 supermicron | 175.4                                           | 367.4            | 91.8              | 0.03                                              | 0.01             | 0.03              |
| 22/09/2017 submicron   | 75.6                                            | 89.3             | 22.3              | 0.26                                              | 0.08             | 0.32              |
| 22/09/2017 supermicron | 96.0                                            | 201.7            | 50.4              | 0.15                                              | 0.03             | 0.11              |
| 28/09/2017 submicron   | 26.5                                            | 109.0            | 27.2              | 0.52                                              | 0.05             | 0.19              |
| 28/09/2017 supermicron | 100.3                                           | 284.1            | 71.0              | NA                                                | NA               | NA                |
| 1/10/2017 submicron    | 48.1                                            | 124.2            | 31.1              | 0.04                                              | 0.01             | 0.02              |
| 1/10/2017 supermicron  | 115.3                                           | 236.1            | 59.0              | 0.03                                              | 0.01             | 0.02              |
| 4/10/2017 submicron    | 73.4                                            | 235.2            | 58.8              | 1.22                                              | 0.12             | 0.49              |
| 4/10/2017 supermicron  | 103.0                                           | 327.9            | 82.0              | NA                                                | NA               | NA                |
| 6/10/2017 submicron    | 50.3                                            | 174.8            | 43.7              | 1.27                                              | 0.11             | 0.42              |
| 6/10/2017 supermicron  | 105.4                                           | 268.5            | 67.1              | NA                                                | NA               | NA                |
| 7/10/2017 submicron    | 31.9                                            | 111.0            | 27.8              | 5.30                                              | 0.45             | 1.79              |
| 7/10/2017 supermicron  | 95.4                                            | 219.8            | 55.0              | 0.05                                              | 0.01             | 0.04              |
| 10/10/2017 submicron   | 83.7                                            | 199.6            | 49.9              | 0.12                                              | 0.02             | 0.08              |
| 10/10/2017 supermicron | 90.9                                            | 199.0            | 49.7              | 0.04                                              | 0.01             | 0.03              |
| averaged submicron     | 60.4 <sup>c</sup>                               | 137.7            | 34.4              | 1.14                                              | 0.11             | 0.43              |
| averaged supermicron   | 110.2                                           | 263.1            | 65.8              | 0.04                                              | 0.01             | 0.05              |

<sup>a</sup> TDN includes the parameter dissolved inorganic ammonium, nitrite, nitrate and dissolved organic nitrogen-containing compounds and these results are in good agreement with (Mueller et al., 2009)

10 <sup>b</sup> calculation of the WSON content focusing on measured TDN concentration in each Berner stage under the assumption that 25 % of marine total nitrogen consist of WSON as described in Lesworth et al. (2010); (25 % of TDN = WSON)

<sup>c</sup> averaged WSOC concentration with  $0.06 \pm 0.02 \mu\text{g m}^{-3}$  in the submicron size range at the CVAO was in same order of magnitude as the WSOC concentration of the PM<sub>1</sub> samples ( $0.11 \pm 0.03 \mu\text{g m}^{-3}$ ) collected at the same time at the CVAO (van Pinxteren et al., (2019a))

<sup>d</sup> consideration of the carbon content of the individual amino acids (listed in Table S6) to calculate the percentage contribution of  $\Sigma$ FAA to

15 WSOC

° consideration of the nitrogen content of the individual amino acids (listed in Table S6) to calculate the percentage contribution of  $\Sigma$ FAA to TDN and WSON

5 **Table S10: Atmospheric concentration ( $\text{ng m}^{-3}$ ) of particulate matter (PM), WSOC, sodium ( $\text{Na}^+$ ), MSA and  $\Sigma$ FAA in the size-segregated aerosol particle samples at the CVAO and at the MV station on sampling days (4/10/2017, 6/10/2017, 7/10/2017) and as an average of these three days; NA – not available data**

| date                                      | Berner stage | atmospheric concentration in $\text{ng m}^{-3}$ |      |      |      |               |       |      |      |              |     |
|-------------------------------------------|--------------|-------------------------------------------------|------|------|------|---------------|-------|------|------|--------------|-----|
|                                           |              | PM                                              |      | WSOC |      | $\text{Na}^+$ |       | MSA  |      | $\Sigma$ FAA |     |
|                                           |              | CVAO                                            | MV   | CVAO | MV   | CVAO          | MV    | CVAO | MV   | CVAO         | MV  |
| 4/10/2017                                 | 1            | 233                                             | NA   | 23.1 | 24.9 | 22.6          | 4.1   | 0.4  | 0.5  | 0.9          | 0.3 |
|                                           | 2            | 1821                                            | 302  | 27.3 | 2.2  | 15.3          | 9.9   | 11.5 | 1.9  | 3.7          | 0.9 |
|                                           | 3            | 2774                                            | 1516 | 23.0 | 4.7  | 148.3         | 44.3  | 6.5  | 4.2  | 0.4          | 0.7 |
|                                           | 4            | 12454                                           | 5116 | 52.2 | 5.5  | 1101.5        | 260.4 | 4.1  | 3.7  | 0.2          | 2.9 |
|                                           | 5            | 1308                                            | *    | 50.8 | *    | 1277.4        | *     | 0.8  | *    | 0.2          | *   |
| 6/10/2017                                 | 1            | 124                                             | 82   | 0.0  | 0.9  | 0.0           | 6.8   | 0.4  | 0.3  | 0.1          | 0.3 |
|                                           | 2            | 1707                                            | 260  | 23.4 | 0.4  | 8.7           | 7.8   | 14.5 | 0.9  | 2.2          | 0.3 |
|                                           | 3            | 2539                                            | 902  | 26.9 | 2.0  | 124.8         | 6.3   | 6.0  | 2.5  | 0.6          | 1.3 |
|                                           | 4            | 10466                                           | 3269 | 57.1 | 3.8  | 1062.3        | 72.1  | 3.9  | 1.6  | NA           | 0.3 |
|                                           | 5            | 9472                                            | 3085 | 48.3 | 4.7  | 1189.3        | 74.6  | 0.7  | 1.5  | 0.2          | 0.3 |
| 7/10/2017                                 | 1            | NA                                              | NA   | 0.0  | 0.7  | 1.7           | 0.0   | 0.5  | 0.04 | 1.9          | 0.3 |
|                                           | 2            | 1141                                            | 235  | 7.8  | 3.0  | 10.5          | 20.3  | 9.2  | 2.3  | 3.0          | NA  |
|                                           | 3            | 5121                                            | 1198 | 24.1 | 3.0  | 126.4         | 53.5  | 5.1  | 3.5  | 1.4          | 0.5 |
|                                           | 4            | 18294                                           | 4057 | 54.2 | 5.9  | 1230.3        | 105.8 | 3.3  | 1.7  | 0.3          | 0.2 |
|                                           | 5            | 18240                                           | 3291 | 41.2 | 8.6  | 1431.2        | 78.5  | 0.6  | 1.1  | 0.2          | 0.1 |
| average of<br>4/10,<br>6/10,<br>7/10/2017 | 1            | 178                                             | 82   | 7.7  | 8.8  | 8.1           | 3.6   | 0.4  | 0.3  | 1.0          | 0.3 |
|                                           | 2            | 1556                                            | 266  | 19.5 | 1.9  | 11.5          | 12.7  | 11.7 | 1.7  | 3.0          | 0.4 |
|                                           | 3            | 3478                                            | 1205 | 24.7 | 3.3  | 133.2         | 34.7  | 5.9  | 3.4  | 0.8          | 0.8 |
|                                           | 4            | 13738                                           | 4147 | 54.5 | 5.1  | 1131.3        | 146.1 | 3.8  | 2.3  | 0.2          | 1.1 |
|                                           | 5            | 13600                                           | 3188 | 46.8 | 6.6  | 1299.3        | 76.6  | 0.7  | 1.3  | 0.2          | 0.2 |

\* this size segregated aerosol sample (B4 of 4/10/2017 at the MV station) was not investigated

**Table S11: Cloud water samples at the MV station: sampling time, measured liquid water content and the atmospheric concentration of sodium, sulfate, MSA and  $\Sigma$ FAA**

| sampling start   | sampling stop   | liquid water content | atmospheric concentration of |                      |                    |                    |
|------------------|-----------------|----------------------|------------------------------|----------------------|--------------------|--------------------|
|                  |                 |                      | sodium                       | sulfate              | MSA                | $\Sigma$ FAA       |
| local time       | local time      | $\text{g m}^{-3}$    | $\mu\text{g m}^{-3}$         | $\mu\text{g m}^{-3}$ | $\text{ng m}^{-3}$ | $\text{ng m}^{-3}$ |
| 27/09/2017 19:00 | 28/09/2017 7:30 | 0.424                | 1.6                          | 1.8                  | 11.0               | 34.3               |
| 28/09/2017 19:00 | 29/09/2017 7:30 | 0.459                | 6.4                          | 3.6                  | 20.7               | 45.2               |
| 5/10/2017 7:45   | 5/10/2017 10:35 | 0.249                | 5.3                          | 3.6                  | 33.8               | 30.7               |
| 5/10/2017 10:40  | 5/10/2017 17:38 | 0.117                | 5.4                          | 2.8                  | 29.2               | 37.7               |
| 5/10/2017 17:40  | 5/10/2017 20:10 | 0.373                | 5.8                          | 3.2                  | 39.0               | 351.6              |
| 5/10/2017 20:10  | 5/10/2017 23:30 | 0.325                | 5.1                          | 3.3                  | 35.3               | 63.8               |
| 5/10/2017 23:30  | 6/10/2017 4:00  | 0.205                | 4.1                          | 2.4                  | 22.1               | 11.2               |
| 6/10/2017 4:05   | 6/10/2017 8:00  | 0.254                | 3.9                          | 2.1                  | 21.1               | 443.8              |
| 7/10/2017 7:48   | 7/10/2017 11:48 | 0.198                | 5.7                          | 2.6                  | 25.1               | 409.4              |
| 7/10/2017 19:00  | 8/10/2017 7:00  | 0.366                | 7.2                          | 3.6                  | 23.9               | 489.8              |

5

10

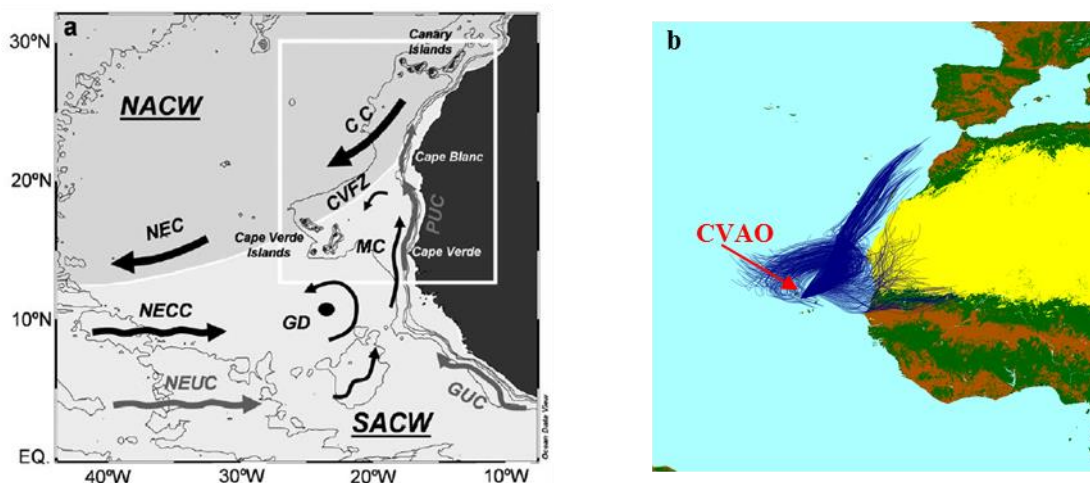

5 **Figure S1: Overview of (a) the water current at the Cape Verde islands (study of Peña-Izquierdo et al., 2012) and (b) the 96 h backward trajectory of an aerosol sample with ‘predominant marine’ air masses of 5/10/2017 at the CVAO**

The comparability of the different marine matrices

Spot measurements in the ocean (ULW, SML) were taken during the sampling time (24 h) of size-segregated aerosol particle samples. As basis for a possible comparison, the origins of the aerosol particles and of the seawater samples had to be investigated in more detail. Due to the origin of the air masses using 96 h backward trajectories, the concentrations of inorganic ions and mineral dust tracers on the aerosol particles the aerosol particles were considered to be mainly of marine origin (section 3.2). Regarding the seawater, it was shown that despite of a strong variability of  $\Sigma$ FAA in seawater samples, the measured  $\Sigma$ FAA concentrations in the ULW and especially in the SML samples are representative for the investigated marine region, the tropical Atlantic Ocean (section 3.1). van Pinxteren et al. (2017) demonstrated that at the CVAO the air masses follow the water current (as described in Peña-Izquierdo et al. (2012)) enhancing the organic carbon link between the SML and the aerosol particles. As mainly winds drive the ocean currents in the upper 100 m of the ocean, a likely connection between DOC on the aerosol particles and in the SML was concluded in van Pinxteren et al. (2017). Regarding the backward trajectories of ‘predominant marine’ aerosol particles together with the water current of Peña-Izquierdo et al. (2012) (Fig. S1), it could be concluded that there is a likely connection between FAA as part of OM on the aerosol particles and FAA as part of OM in the SML. Moreover, during the campaign additional size-segregated aerosol particle and cloud water samples were simultaneously taken at the mountain station (MV) (744 m a.s.l) to investigate the vertical transport of FAA and their abundance in marine cloud water.

**Table S12: Mean lifetime ( $\tau$ ) of investigated amino acids depending on pH-value and different atmospheric scenarios of ‘remote cloud case’ (for the MV samples) and ‘remote aerosol case’ (for the CVAO samples) adopted from the study of Herrmann et al., 2010**

| analyte       | pH value | remote cloud case* |               | remote aerosol case** |               |
|---------------|----------|--------------------|---------------|-----------------------|---------------|
|               |          | $\tau$ in d        | $\tau$ in min | $\tau$ in d           | $\tau$ in min |
| serine        | 6        | 1.64               | 2361.6        | 0.01                  | 14.4          |
| glycine       | ~ 5.9    | 3.09               | 4449.6        | 0.02                  | 28.8          |
| glutamic acid | 2        | 3.29               | 4737.6        | 0.02                  | 28.8          |
| threonine     | 6.6      | 1.03               | 1483.2        | 0.01                  | 14.4          |
| alanine       | ~ 5.8    | 6.83               | 9835.2        | 0.05                  | 72            |
| GABA          | 6.7      | 1.2                | 1728          | 0.01                  | 14.4          |
| proline       | 6.9      | 1.7                | 2448          | 0.01                  | 14.4          |
| tyrosine      | 7        | 0.04               | 57.6          | 0.0003                | 0.4           |
| methionine    | 5.6      | 0.06               | 86.4          | 0.0005                | 0.7           |
| valine        | 6.6      | 8                  | 11520         | 0.01                  | 14.4          |
| phenylalanine | 5.8      | 0.08               | 115.2         | 0.0006                | 0.9           |
| glutamine     | 6        | 0.97               | 1396.8        | 0.0071                | 10.2          |
| isoleucine    | 6.6      | 0.29               | 417.6         | 0.0021                | 3.0           |
| leucine       | 6        | 0.31               | 446.4         | 0.0023                | 3.3           |

5 the mean life time  $\tau$  of the individual amino acids depends on OH radical concentration, pH value and on the atmospheric scenarios:

\* the ‘remote cloud case’ is valid for the size-segregated aerosol particle and cloud water samples, sampled at the mountain station ‘Monte Verde’ (MV), OH radical concentration of  $2.2 \cdot 10^{-14}$  mol L<sup>-1</sup> (Herrmann et al., 2010) were considered

\*\* the ‘remote aerosol case’ is valid for the size-segregated aerosol particle samples, sampled at the CVAO, OH radical concentration of  $3 \cdot 10^{-12}$  mol L<sup>-1</sup> (Herrmann et al., 2010) were considered

**Table S13: Enrichment factor in aerosol particles ( $EF_{aer}$ ) of  $\Sigma$ FAA and DOC at the CVAO for the case study (4/10/2017, 6/10/2017, 7/10/2017) and averaged results (grey background); NA – not available data**

| sampling stop | $EF_{aer}$ of $\Sigma$ FAA |        |        |        |        | $EF_{aer}$ of DOC |        |        |        |        |
|---------------|----------------------------|--------|--------|--------|--------|-------------------|--------|--------|--------|--------|
|               | B1                         | B2     | B3     | B4     | B5     | B1                | B2     | B3     | B4     | B5     |
| 4/10/2017     | 4.E+03                     | 3.E+04 | 3.E+02 | 2.E+01 | 2.E+01 | 1.E+04            | 2.E+04 | 2.E+03 | 5.E+02 | 5.E+02 |
| 6/10/2017     | NA                         | 1.E+04 | 3.E+02 | NA     | 1E+01  | NA                | 1.E+04 | 8.E+02 | 2.E+02 | 2.E+02 |
| 7/10/2017     | 6.E+04                     | 2.E+04 | 6.E+02 | 1.E+01 | 9E+00  | NA                | 1.E+04 | 3.E+03 | 6.E+02 | 4.E+02 |
| averaged      | 3E+04                      | 2E+04  | 4E+02  | 2E+01  | 1E+01  | 1E+04             | 1E+04  | 2E+03  | 4E+02  | 3E+02  |

The parameter  $EF_{aer}$  regard the transfer from the ocean into the aerosol particles considering the enrichment processes of OM and compounds linked to OM (e.g. FAA) during bubble bursting. Chemical reaction processes during the transfer process are not taken into account.

5

## References

- Dittmar, T., Cherrier, J. and Ludichowski, K. U.: The analysis of amino acids in seawater, in: Practical guidelines for the analysis of seawater, edited by: Wurl, O., CRC Press, Boca Raton, 67-78, 2009.
- Engel, A., and Galgani, L.: The organic sea-surface microlayer in the upwelling region off the coast of Peru and potential implications for air-sea exchange processes, *Biogeosciences*, 13, 989-1007, 10.5194/bg-13-989-2016, 2016.
- Fomba, K. W., Müller, K., van Pinxteren, D., and Herrmann, H.: Aerosol size-resolved trace metal composition in remote northern tropical Atlantic marine environment: case study Cape Verde islands, *Atmos. Chem. Phys.*, 13, 4801-4814, 10.5194/acp-13-4801-2013, 2013.
- Fomba, K. W., Muller, K., van Pinxteren, D., Poulain, L., van Pinxteren, M., and Herrmann, H.: Long-term chemical characterization of tropical and marine aerosols at the Cape Verde Atmospheric Observatory (CVAO) from 2007 to 2011, *Atmos. Chem. Phys.*, 14, 8883-8904, 10.5194/acp-14-8883-2014, 2014.
- Herrmann, H., Hoffmann, D., Schaefer, T., Bräuer, P., and Tilgner, A.: Tropospheric Aqueous-Phase Free-Radical Chemistry: Radical Sources, Spectra, Reaction Kinetics and Prediction Tools, *ChemPhysChem*, 11, 3796-3822, 10.1002/cphc.201000533, 2010.
- Hoffmann, E. H., Tilgner, A., Schrodner, R., Brauer, P., Wolke, R., and Herrmann, H.: An advanced modeling study on the impacts and atmospheric implications of multiphase dimethyl sulfide chemistry, *Proc Natl Acad Sci U S A*, 113, 11776-11781, 10.1073/pnas.1606320113, 2016.
- Kuznetsova, M., and Lee, C.: Dissolved free and combined amino acids in nearshore seawater, sea surface microlayers and foams: Influence of extracellular hydrolysis, *Aquat. Sci.*, 64, 252-268, 10.1007/s00027-002-8070-0, 2002.
- Kuznetsova, M., Lee, C., Aller, J., and Frew, N.: Enrichment of amino acids in the sea surface microlayer at coastal and open ocean sites in the North Atlantic Ocean, *Limnol. Oceanogr.*, 49, 1605-1619, 10.4319/lo.2004.49.5.1605, 2004.
- Lesworth, T., Baker, A. R., and Jickells, T.: Aerosol organic nitrogen over the remote Atlantic Ocean, *Atmos. Environ.*, 44, 1887-1893, 10.1016/j.atmosenv.2010.02.021, 2010.
- Lindroth, P., and Mopper, K.: High performance liquid chromatographic determination of subpicomole amounts of amino acids by precolumn fluorescence derivatization with o-phthalaldehyde, *Analytical Chemistry*, 51, 1667-1674, 10.1021/ac50047a019, 1979.



- Miyazaki, Y., Kawamura, K., Jung, J., Furutani, H., and Uematsu, M.: Latitudinal distributions of organic nitrogen and organic carbon in marine aerosols over the western North Pacific, *Atmos. Chem. Phys.*, 11, 3037-3049, 10.5194/acp-11-3037-2011, 2011.
- 5 Mueller, C., Iinuma, Y., Karstensen, J., van Pinxteren, D., Lehmann, S., Gnauk, T., and Herrmann, H.: Seasonal variation of aliphatic amines in marine sub-micrometer particles at the Cape Verde islands, *Atmos. Chem. Phys.*, 9, 9587-9597, 2009.
- Mueller, K., Lehmann, S., van Pinxteren, D., Gnauk, T., Niedermeier, N., Wiedensohler, A., and Herrmann, H.: Particle characterization at the Cape Verde atmospheric observatory during the 2007 RHaMBLe intensive, *Atmos. Chem. Phys.*, 10, 2709-2721, 10.5194/acp-10-2709-2010, 2010.
- 10 Nagao, I., Matsumoto, K., and Tanaka, H.: Characteristics of dimethylsulfide, ozone, aerosols, and cloud condensation nuclei in air masses over the northwestern Pacific Ocean, *Journal of Geophysical Research: Atmospheres*, 104, 11675-11693, 10.1029/1998jd100108, 1999.
- Peña-Izquierdo, J., Pelegrí, J. L., Pastor, M. V., Castellanos, P., Emelianov, M., Gasser, M., Salvador, J., and Vázquez-Domínguez, E.: The continental slope current system between Cape Verde and the Canary Islands, 2012, 76, 14, 10.3989/scimar.03607.18C, 2012.
- 15 Reinthaler, T., Sintés, E., and Herndl, G. J.: Dissolved organic matter and bacterial production and respiration in the sea-surface microlayer of the open Atlantic and the western Mediterranean Sea, *Limnol. Oceanogr.*, 53, 122-136, 10.4319/lo.2008.53.1.0122, 2008.
- van Pinxteren, M., Muller, C., Iinuma, Y., Stolle, C., and Herrmann, H.: Chemical Characterization of Dissolved Organic Compounds from Coastal Sea Surface Micro layers (Baltic Sea, Germany), *Environ. Sci. Technol.*, 46, 10455-10462, 20 10.1021/es204492b, 2012.
- van Pinxteren, M., Fiedler, B., van Pinxteren, D., Iinuma, Y., Körtzinger, A., and Herrmann, H.: Chemical characterization of sub-micrometer aerosol particles in the tropical Atlantic Ocean: marine and biomass burning influences, *J. Atmos. Chem.*, 72, 105-125, 10.1007/s10874-015-9307-3, 2015.
- van Pinxteren, M., Barthel, S., Fomba, K. W., Muller, K., von Tümpling, W., and Herrmann, H.: The influence of 25 environmental drivers on the enrichment of organic carbon in the sea surface microlayer and in submicron aerosol particles - measurements from the Atlantic Ocean, *Elementa-Sci. Anthropol.*, 5, 21, 10.1525/elementa.225, 2017.
- van Pinxteren, M., Fomba, K. W., Triesch, N., Stolle, C., Wurl, O., Bahlmann, E., Gong, X., Voigtländer, J., Wex, H., Robinson, T. B., Barthel, S., Zeppenfeld, S., Hoffmann, E. H., Roveretto, M., Li, C., Grosselin, B., Daële, V., Senf, F., van Pinxteren, D., Manzi, M., Zabalegui, N., Frka, S., Gašparović, B., Pereira, R., Li, T., Wen, L., Li, J., Zhu, C., Chen, H., Chen, 30 J., Fiedler, B., von Tümpling, W., Read, K. A., Punjabi, S., C. Lewis, A. C., Hopkins, J. R., Carpenter, L. J., Peeken, I., Rixen, T., Schulz-Bull, D., Monge, M. E., Mellouki, A., George, C., Stratmann, F., and Herrmann, H.: Marine organic matter in the remote environment of the Cape Verde Islands - An introduction and overview to the MarParCloud campaign, *Atmos. Chem. Phys. Discuss.*, 2019, 1-63, 10.5194/acp-2019-997, 2019a.
